# Supplementary material
Source: Springer Nature journal article supplement (https://www.springermedizin.de/resource/supplementary/12911_2007_185_MOESM2_ESM.pdf/9527330)

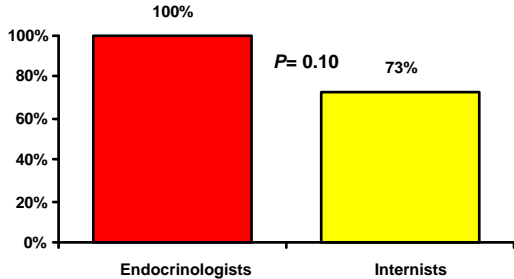

a.

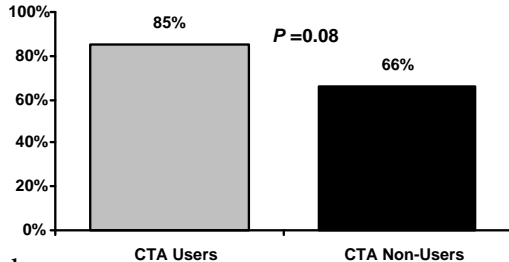

b.

Supplement: MOESM2 [file 9527330]
